# Supplementary material
Source: PubMed Central journal article supplement (PMC7384935)
Supplement: NIHMS1581046-supplement-1.pdf [file NIHMS1581046-supplement-1.pdf]

## Supplementary Information

### A Year-Long Extended Release Nanoformulated Cabotegravir Prodrug

**Tanmay A. Kulkarni<sup>2†</sup>, Aditya N. Bade<sup>1†</sup>, Brady Sillman<sup>1</sup>, Bhagya Laxmi Dyavar Shetty<sup>1</sup>, Melinda S. Wojtkiewicz<sup>1</sup>, Nagsen Gautam<sup>2</sup>, James R. Hilaire<sup>1</sup>, Sruthi Sravanam<sup>1</sup>, Adam Szlachetka<sup>1</sup>, Benjamin G. Lamberty<sup>1</sup>, Brenda M. Morsey<sup>1</sup>, Howard S. Fox<sup>1</sup>, Yazen Alnouti<sup>2</sup>, JoEllyn M. McMillan<sup>1</sup>, R. Lee Mosley<sup>1</sup>, Jane Meza<sup>3</sup>, Paul L. Domanico<sup>4</sup>, Tai-Yuen Yue<sup>4</sup>, Gary Moore<sup>4</sup>, Benson J. Edagwa<sup>1\*</sup>, and Howard E. Gendelman<sup>1,2\*</sup>**

<sup>1</sup>*Department of Pharmacology and Experimental Neuroscience, University of Nebraska Medical Center, Omaha, NE 68198*

<sup>2</sup>*Department of Pharmaceutical Sciences, University of Nebraska Medical Center, Omaha, NE 68198*

<sup>3</sup>*Department of Biostatistics, University of Nebraska Medical Center, Omaha, NE 68198*

<sup>4</sup>*Department of Global Health Sciences, The Clinton Health Access Initiative, Boston, MA 02127*

†Contributed equally

\*Corresponding authors: Howard E. Gendelman, M.D., Department of Pharmacology and Experimental Neuroscience, University of Nebraska Medical Center, Omaha, NE 68198-5880, USA; phone: 402-559-8920; fax: 402-559-3744; email: [hegendel@unmc.edu](mailto:hegendel@unmc.edu); ORCID: <https://orcid.org/0000-0002-7831-0370> and Benson J. Edagwa, Ph.D., Department of Pharmacology and Experimental Neuroscience, University of Nebraska Medical Center, Omaha, NE 68198-5800, USA; phone: 402-559-8916; fax: 402-559-7495; email: [benson.edagwa@unmc.edu](mailto:benson.edagwa@unmc.edu), ORCID: <https://orcid.org/0000-0003-1484-9331>

## Supplementary Figures

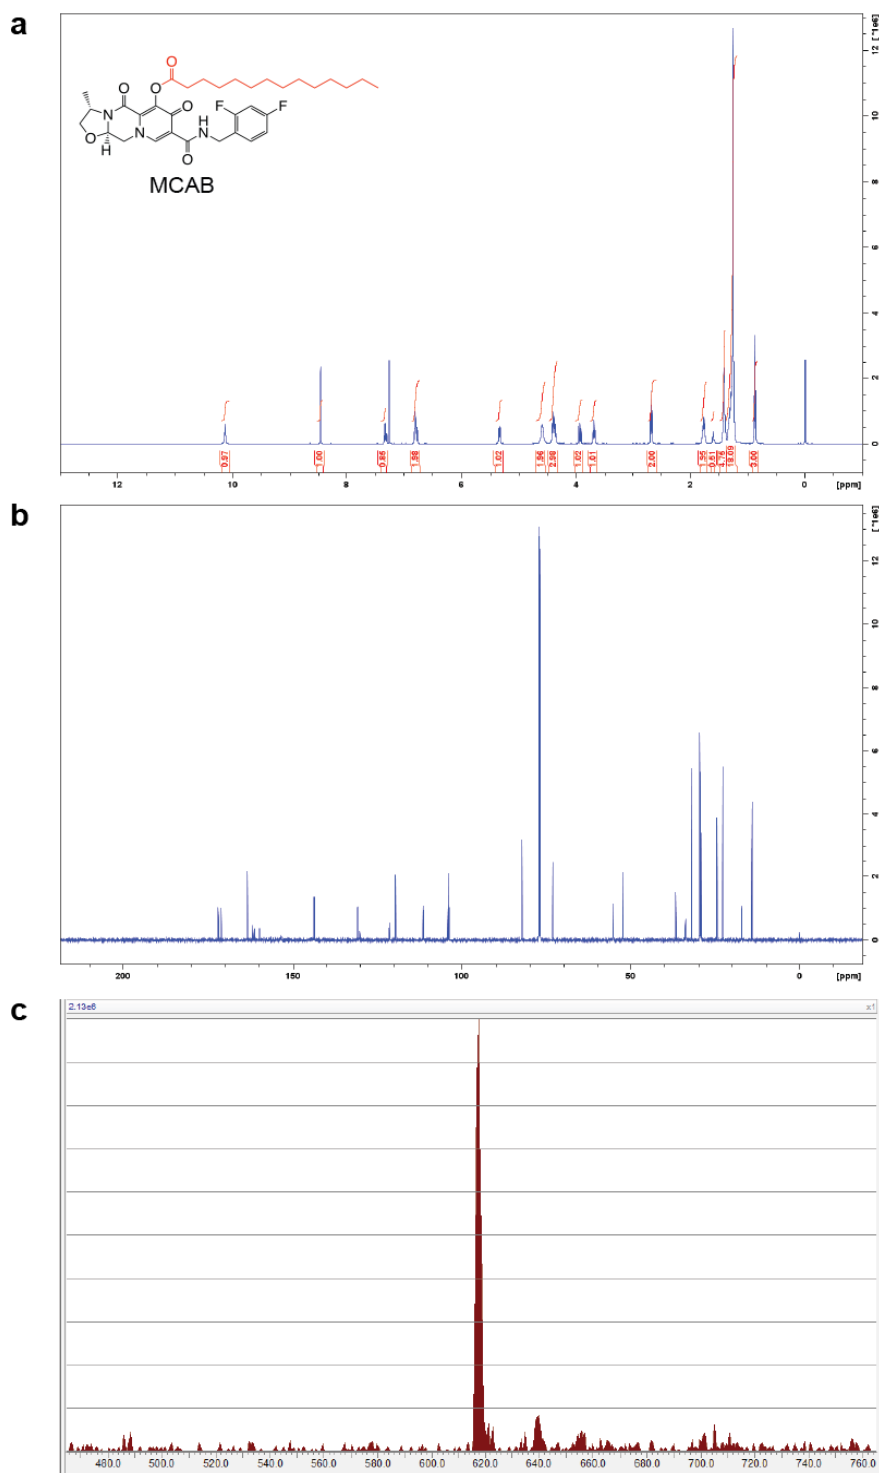

**Supplementary figure 1. (a)  $^1\text{H}$  and (b)  $^{13}\text{C}$  NMR of MCAB. Proton and carbon-13 NMR spectra confirmed the successful synthesis of MCAB. (c) ESI-MS infusion of MCAB generated a strong signal at 615.31 m/z. (a-c) Experiments were repeated independently five times with equivalent results.**

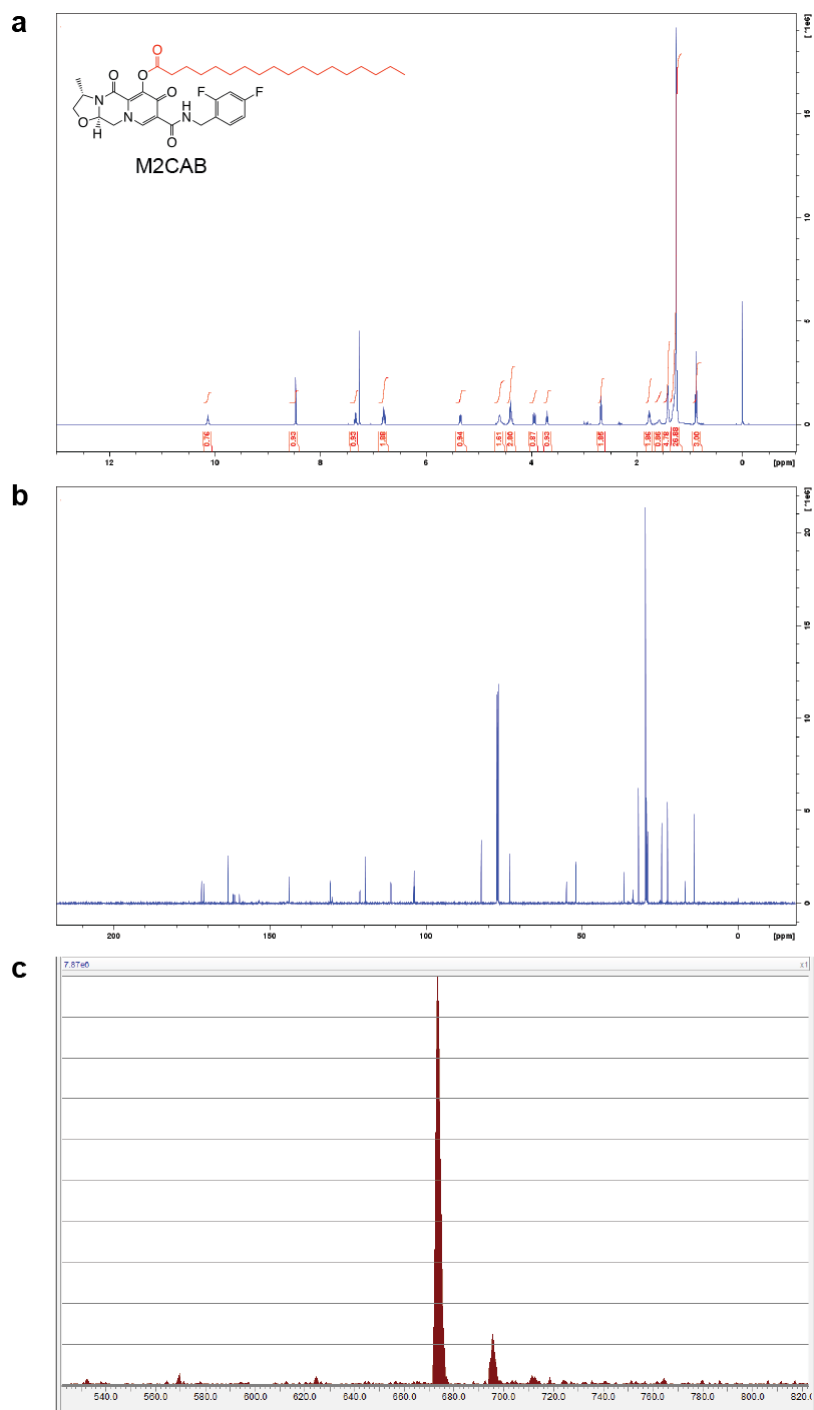

**Supplementary figure 2. (a)  $^1\text{H}$  and (b)  $^{13}\text{C}$  NMR of M2CAB.** Proton and carbon-13 NMR spectra confirmed the successful synthesis of M2CAB. (c) ESI-MS infusion of M2CAB generated a strong signal at 671.37 m/z. (a-c) Experiments were repeated independently five times with equivalent results.

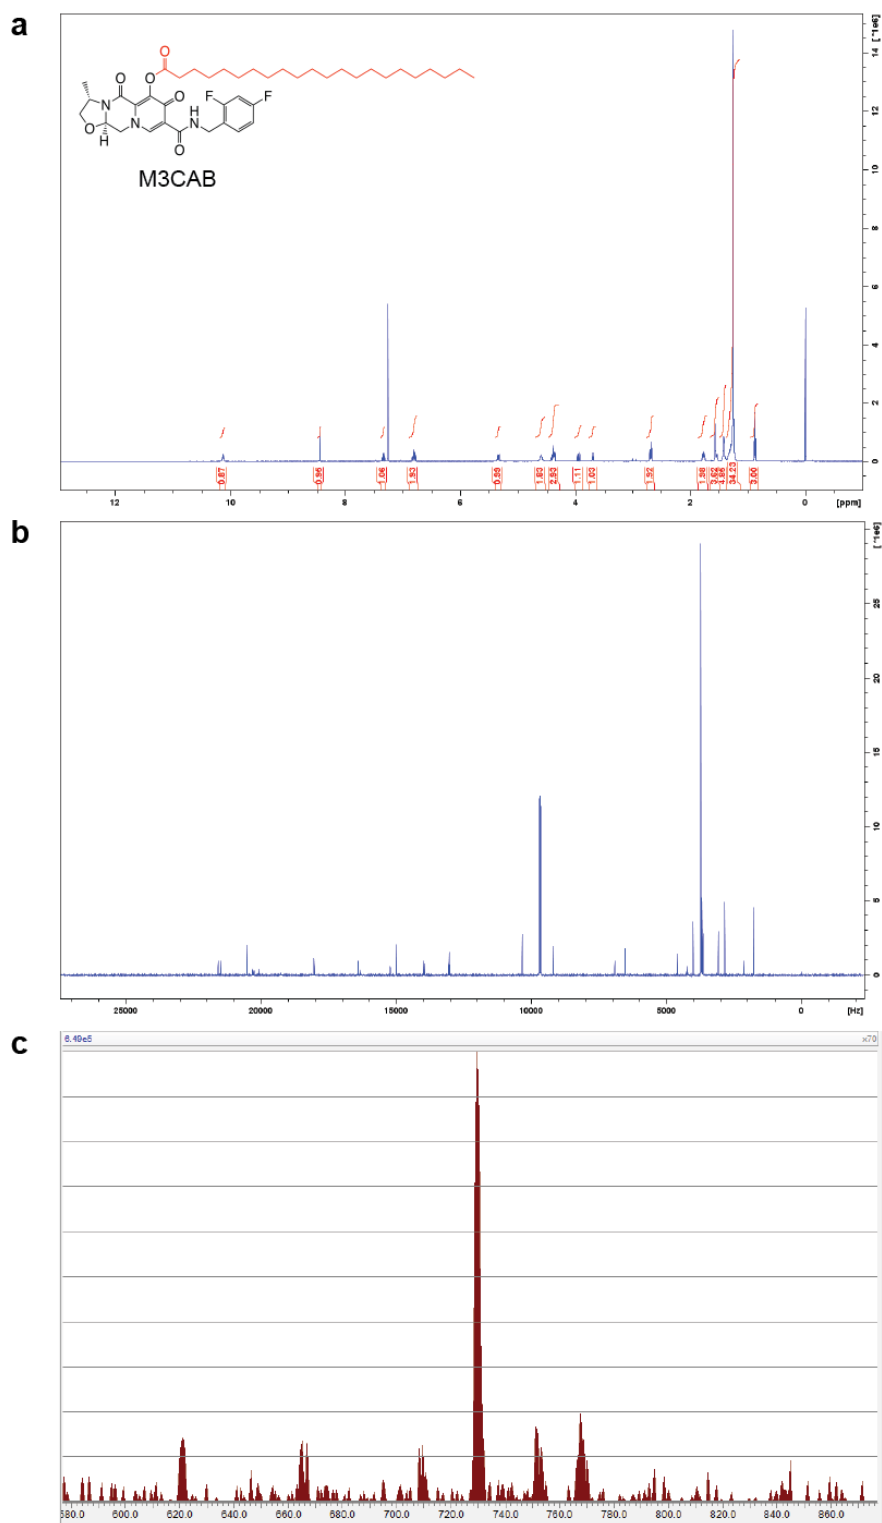

**Supplementary figure 3. (a)  $^1\text{H}$  and (b)  $^{13}\text{C}$  NMR of M3CAB. Proton and carbon-13 NMR spectra confirmed the successful synthesis of M3CAB. (c) ESI-MS infusion of M3CAB generated a strong signal at 727.44 m/z. (a-c) Experiments were repeated independently five times with equivalent results.**

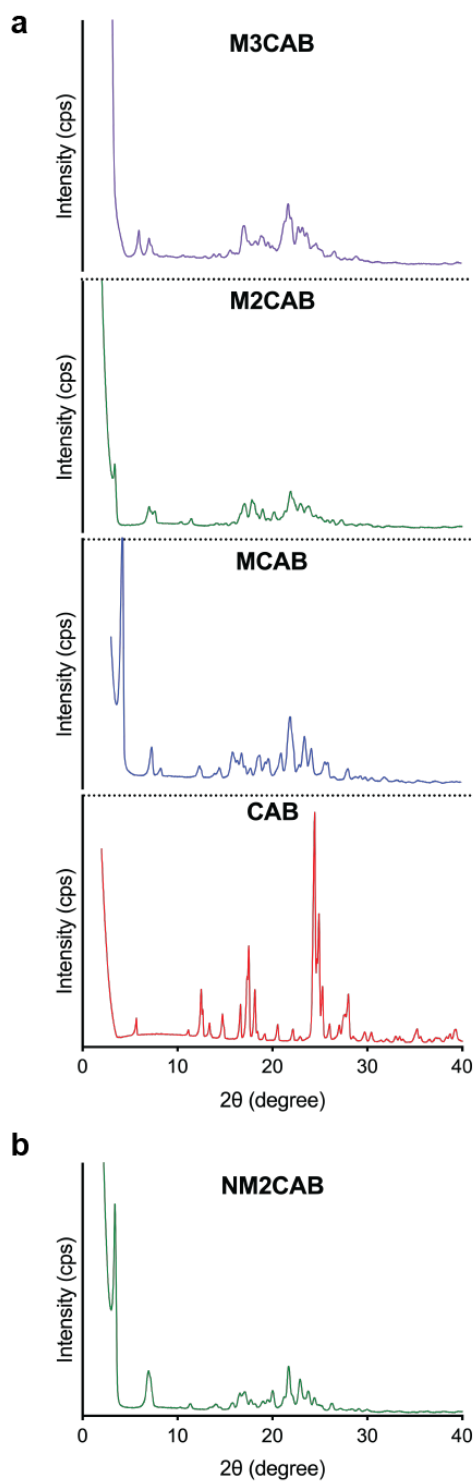

**Supplementary figure 4. (a) X-ray diffraction (XRD) of CAB and prodrugs.** XRD analysis of CAB, MCAB, M2CAB, and M3CAB at  $2\theta = 2-70$  at  $1^\circ/\text{min}$ . **(b) XRD of NM2CAB.** XRD analysis of NM2CAB at  $2\theta = 2-70$  at  $1^\circ/\text{min}$ . **(a-b)** Experiments were repeated independently three times with equivalent results.

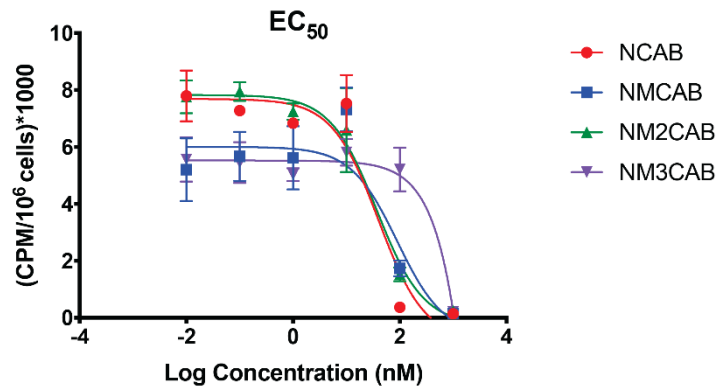

**Supplementary figure 5. EC<sub>50</sub> assessment of nanoformulations.** Antiviral activity of NCAB, NMCAB, NM2CAB, or NM3CAB was determined in MDM over a range of concentrations (0.01-1000 nM) by measuring HIV-1 RT activity after HIV-1<sub>ADA</sub> challenge with at an MOI of 0.1. Data are expressed as the mean  $\pm$  SEM for N = 3 biological replicates.

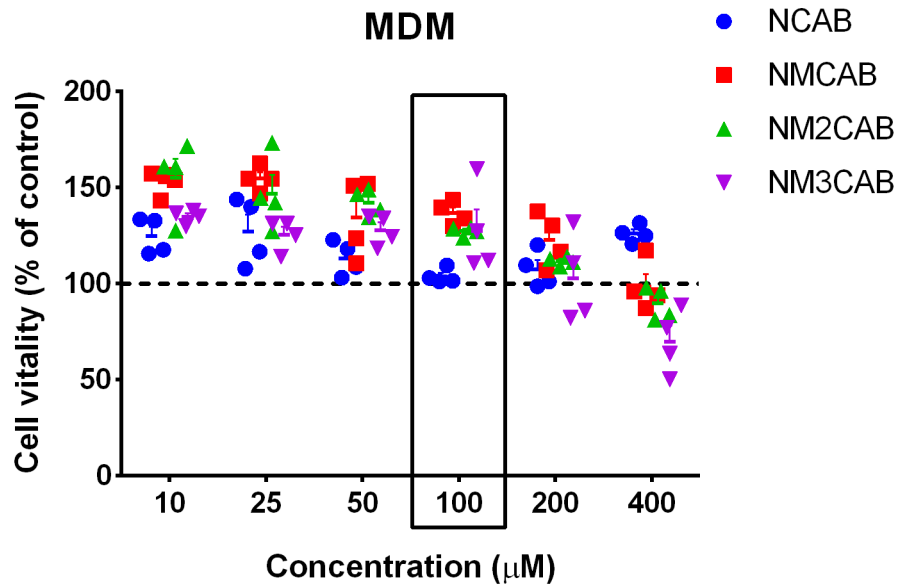

**Supplementary figure 6. Cytotoxicity assay.** The cellular vitality in MDM was determined after 24 hours of MTT treatment over a range (10-400 µM) of concentrations. The concentration in the box did not show cytotoxicity. Thus, 100 µM treatment concentration was chosen for further analyses. Data are expressed as the mean ± SEM for N = 4 biological replicates.

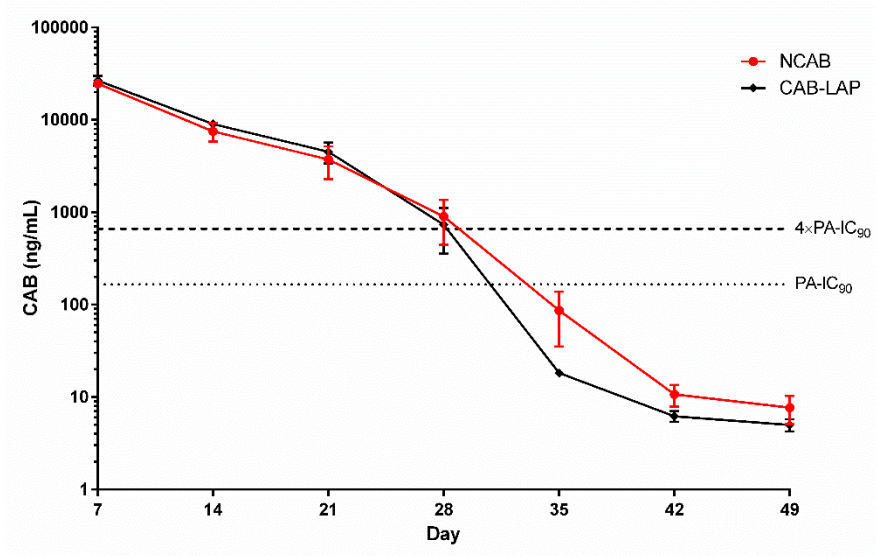

**Supplementary figure 7. Comparative PK assessment for NCAB and CAB LA.** Male BALB/cJ mice were administered a single IM 45 mg/kg dose of NCAB or CAB-LAP (currently in clinic). Plasma CAB levels were measured weekly up to day 49. Top bold dashed line indicates plasma CAB 4×PA-IC<sub>90</sub> of 664 ng/mL, and the bottom stippled line shows the plasma CAB PA-IC<sub>90</sub> of 166 ng/mL. Plasma CAB levels in both treatments were equivalent. Data are expressed as mean ± SEM. For NCAB, N = 10 animals and for CAB LA, N = 5 animals. Data for CAB-LAP were extracted from<sup>14</sup> and adapted for comparisons.



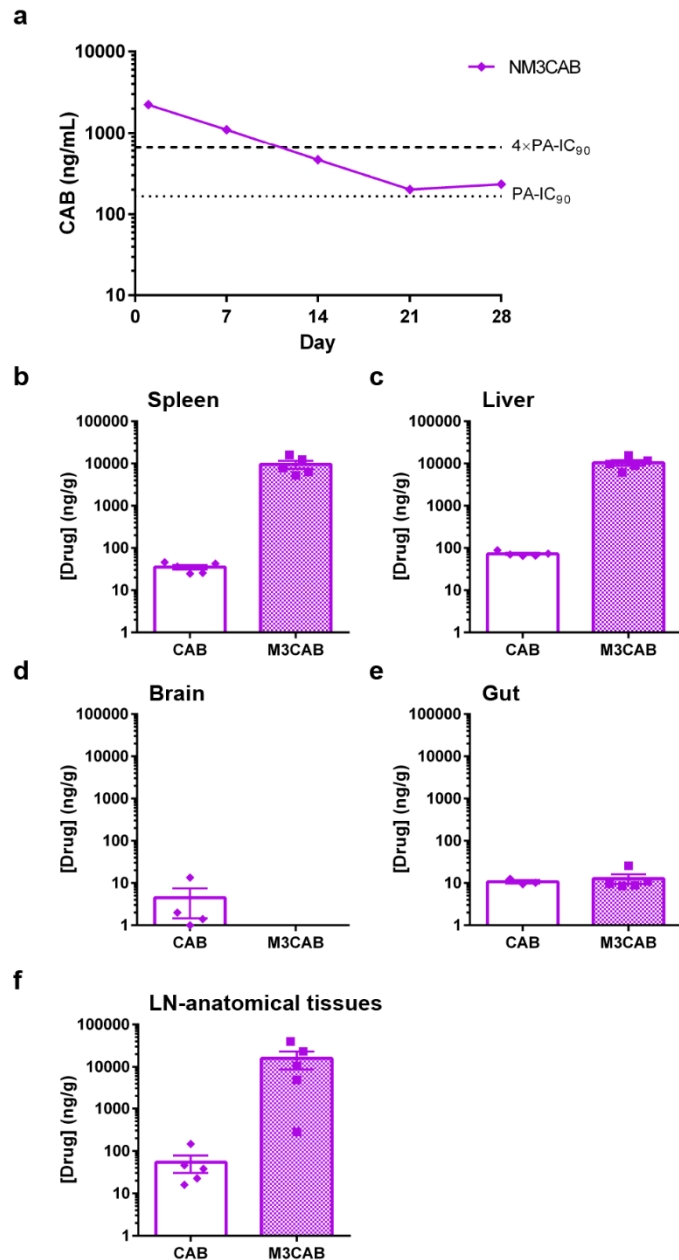

**Supplementary figure 8. NM3CAB PK and BD testing in NSG mice.** (a) Plasma CAB levels were measured 28 days after a single IM injection of NM3CAB (45 mg/kg CAB-equivalent dose) in female NSG mice. Drug levels in plasma were monitored weekly. Top bold dashed line indicates plasma CAB  $4\times PA-IC_{90}$  of 664 ng/mL, and the bottom stippled line shows the plasma CAB  $1\times PA-IC_{90}$  of 166 ng/mL. (b - e) Tissue concentrations of CAB and M3CAB at day 28 following NM3CAB administration were quantitated in (b) spleen, (c) liver, (d) brain, (e) gut, and (f) lymph nodes-anatomical associated tissues. Data are expressed as mean  $\pm$  SEM. Animal numbers,  $N = 5$ .

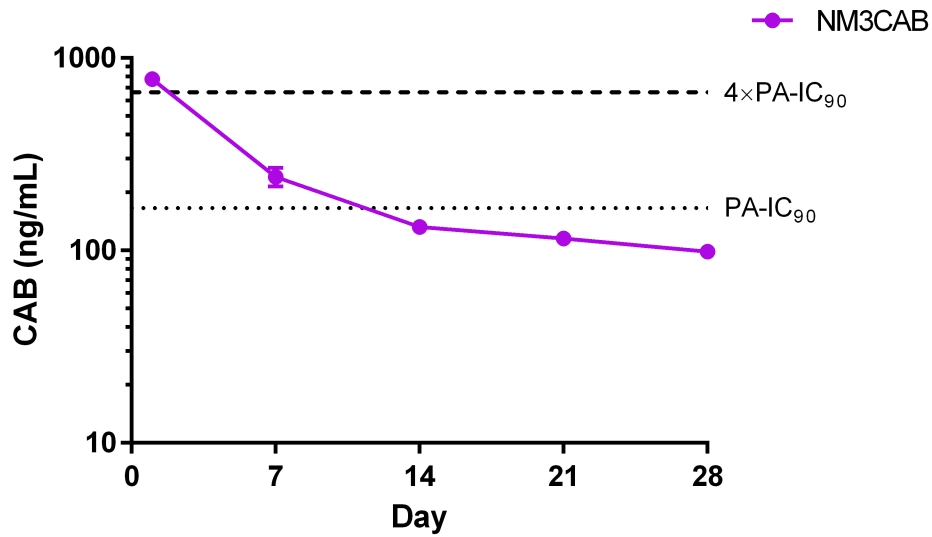

**Supplementary figure 9. NM3CAB PK testing in BALB/cJ mice.** Plasma CAB levels were assessed 28 days after a single IM injection of NM3CAB (45 mg/kg CAB-equivalent dose) in male BALB/cJ mice. Drug levels in plasma were monitored weekly. Top bold dashed line indicates plasma CAB  $4 \times PA-IC_{90}$  of 664 ng/mL, and the bottom stippled line shows the plasma CAB  $1 \times PA-IC_{90}$  of 166 ng/mL. Data are expressed as mean  $\pm$  SEM. Animal numbers,  $N = 4$ .

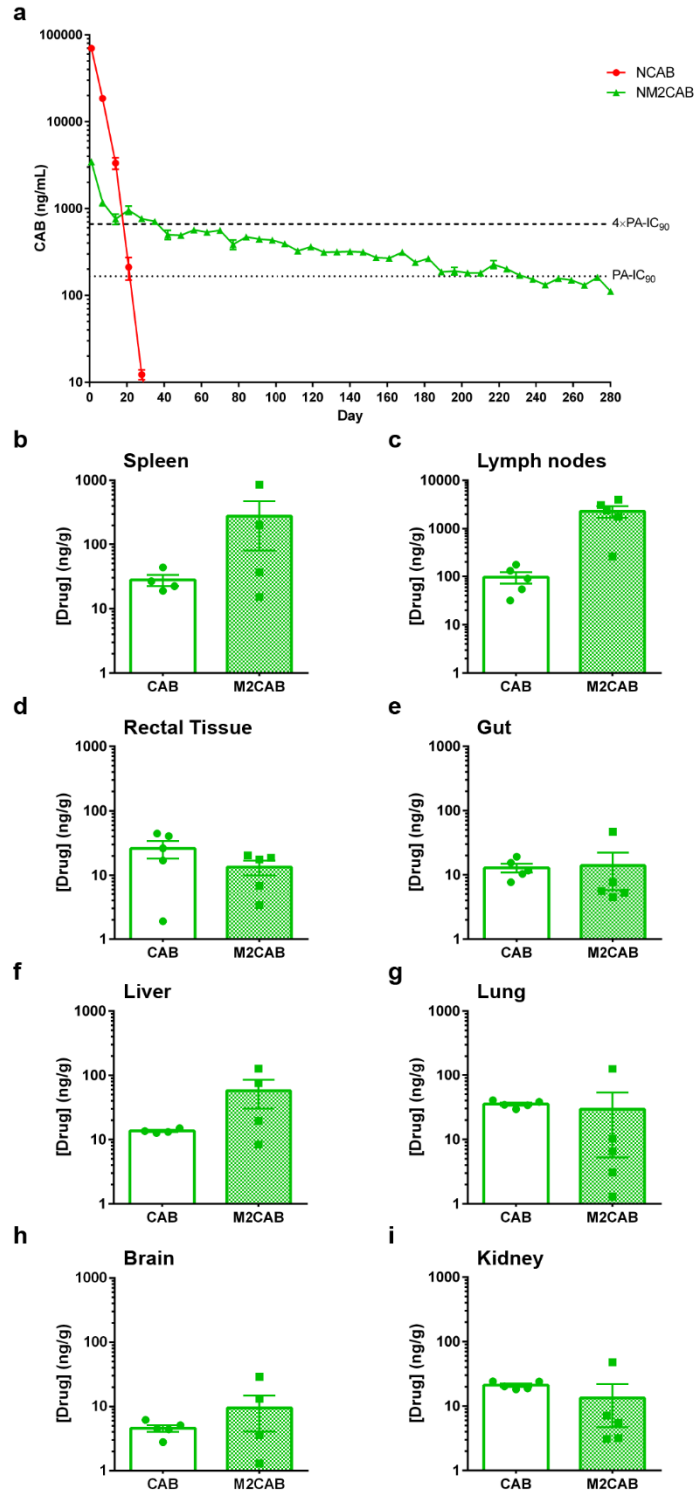

**Supplementary figure 10. NCAB or NM2CAB BD in male BALB/cJ mice. (a)** CAB and M2CAB levels were assessed 280 days after a single IM injection of NCAB or NM2CAB (45 mg/kg CAB-equivalents) in the plasma. Drug levels in plasma were monitored weekly. Top bold dashed line indicates plasma CAB

4×PA-IC<sub>90</sub> of 664 ng/mL, and the bottom stippled line shows the plasma CAB 1×PA-IC<sub>90</sub> of 166 ng/mL. **(b)**  
- **i)** Tissue concentrations of CAB and M2CAB at day 280 following NM2CAB administration were quantitated in **(b)** spleen, **(c)** lymph nodes, **(d)** rectal tissue, **(e)** gut, **(f)** liver, **(g)** lung, **(h)** brain, and **(i)** kidney. Data are expressed as mean ± SEM. Animal numbers/group, N = 5.

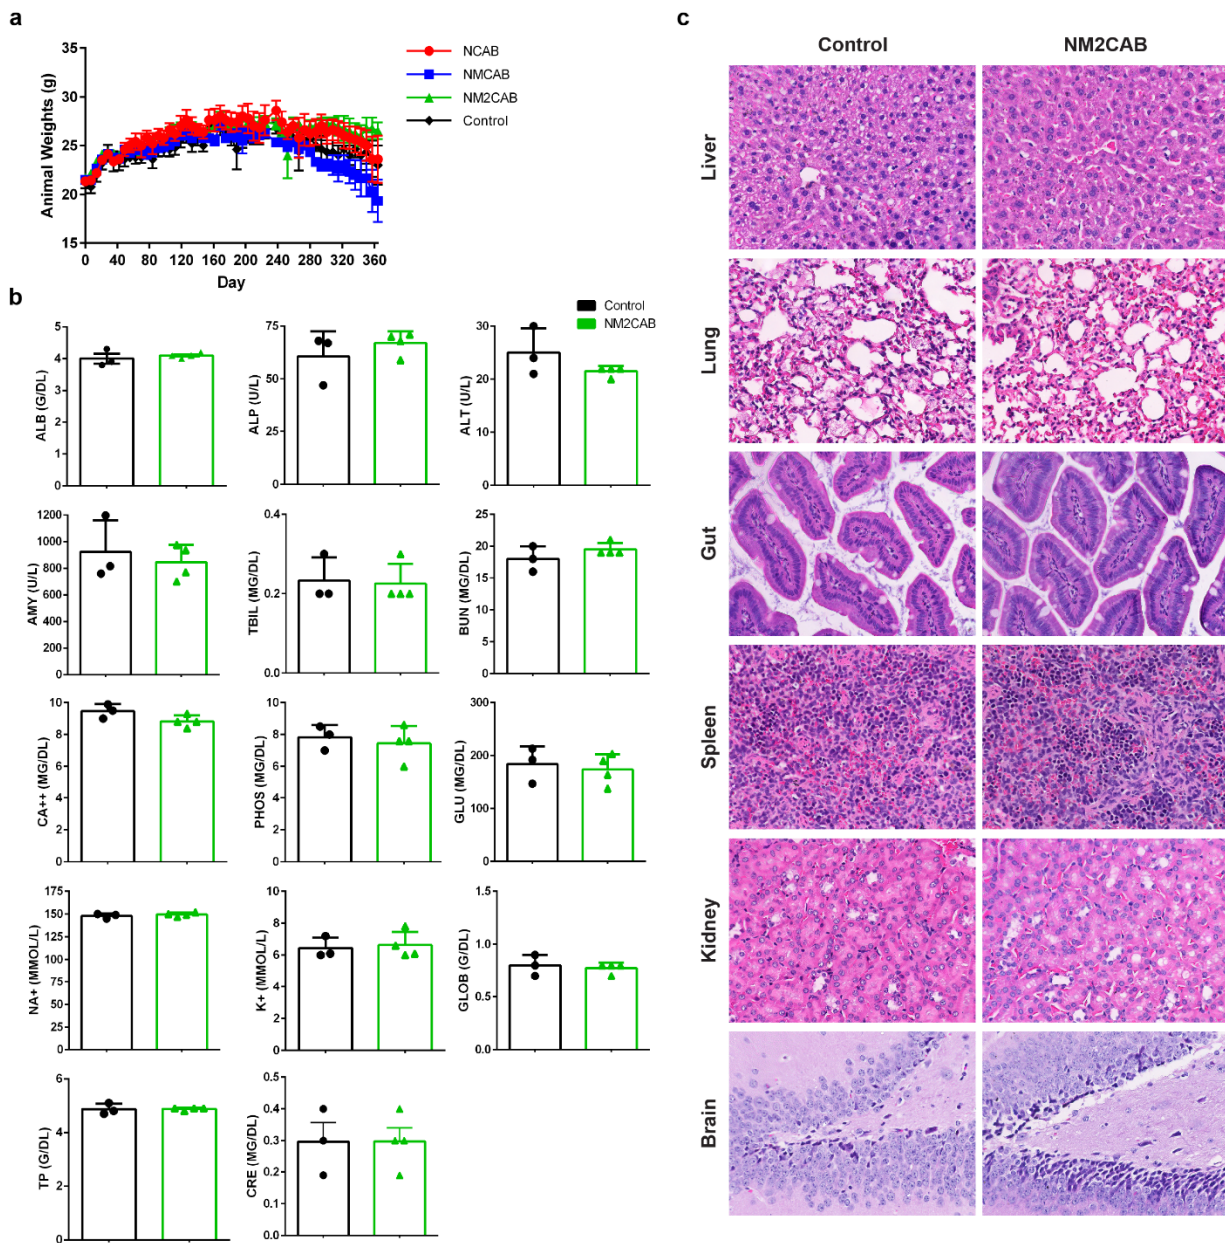

**Supplementary figure 11. Toxicity profiles in female NSG mice.** (a) Weights of mice treated with NCAB, NMCAB, or NM2CAB, and of controls were recorded. Age matched untreated mice were used as controls. Data are expressed as mean  $\pm$  SEM, and animal numbers in each group,  $N = 3$  (control),  $N = 5$  (NCAB),  $N = 3$  (NMCAB), and  $N = 4$  (NM2CAB). (b) Comprehensive serum chemistry profiles were analyzed in mice post-NM2CAB administration. Examined parameters were albumin (ALB), alkaline phosphatase (ALP), alanine aminotransferase (ALT), amylase (AMY), total bilirubin (TBIL), blood urea

*nitrogen (BUN), total calcium (CA<sup>++</sup>), phosphorus (PHOS), glucose (GLU), sodium (NA<sup>+</sup>), potassium (K<sup>+</sup>), globulin (GLOB), total protein (TP), and creatinine (CRE). Data are expressed as mean  $\pm$  SEM, and animal numbers/group, N = 3 (for control) and N = 4 (for NM2CAB). (c) Histopathology was performed on tissues of mice treated with NM2CAB. Tissue sections (5  $\mu$ m) of liver, lung, gut, spleen, kidney, and brain were stained with hematoxylin and eosin (H&E) and evaluated by a certified pathologist. Images were captured with a 40 $\times$  objective. No adverse events or abnormal pathology was detected in any of the tests. Animal numbers in each group, N = 3 (for control) and N = 4 (for NM2CAB). Histopathology evaluation of tissues of mice at 364 days post-treatment was done a single time.*

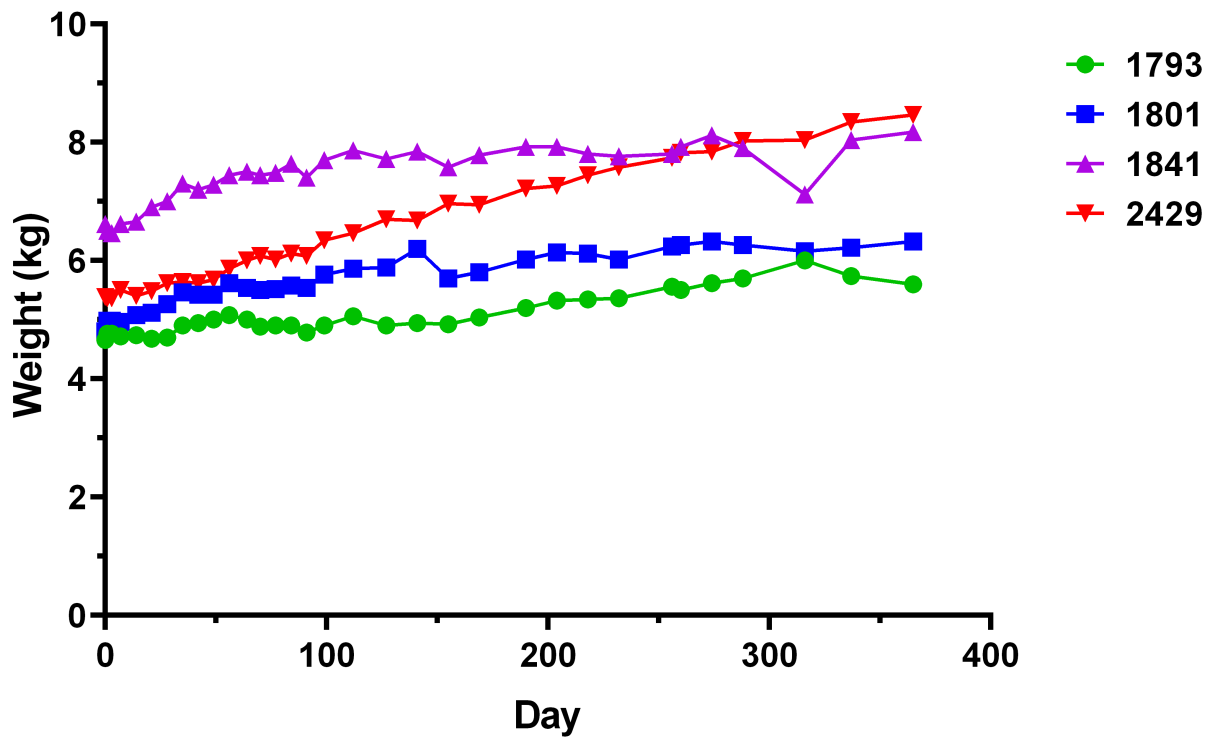

**Supplementary figure 12. Weights of rhesus macaques were recorded to day 365 for each animal.**

This was performed to evaluate well-being of the animals following NM2CAB treatments. N = 4 rhesus macaques

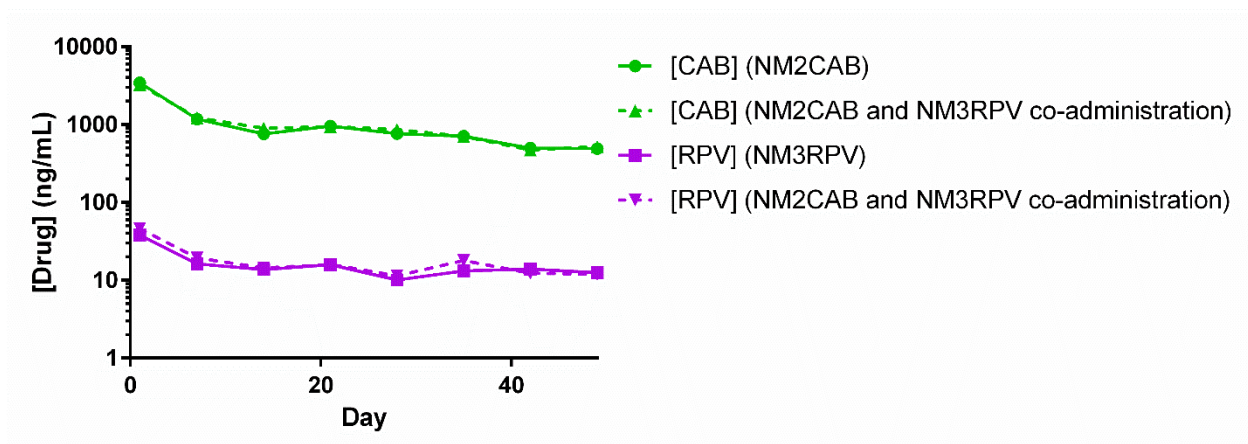

**Supplementary figure 13. Potential drug-drug interactions.** Male Balb/cJ mice were administered via IM injection, NM2CAB alone, NM3RPV alone, or both NM2CAB and NM3RPV (all doses as 45 mg/kg CAB or RPV equivalents) to determine drug-drug interactions of prodrug nanoformulations. Plasma levels of CAB or RPV were measured up to day 49. Data are expressed as mean  $\pm$  SEM. Animal numbers per group, N = 5.



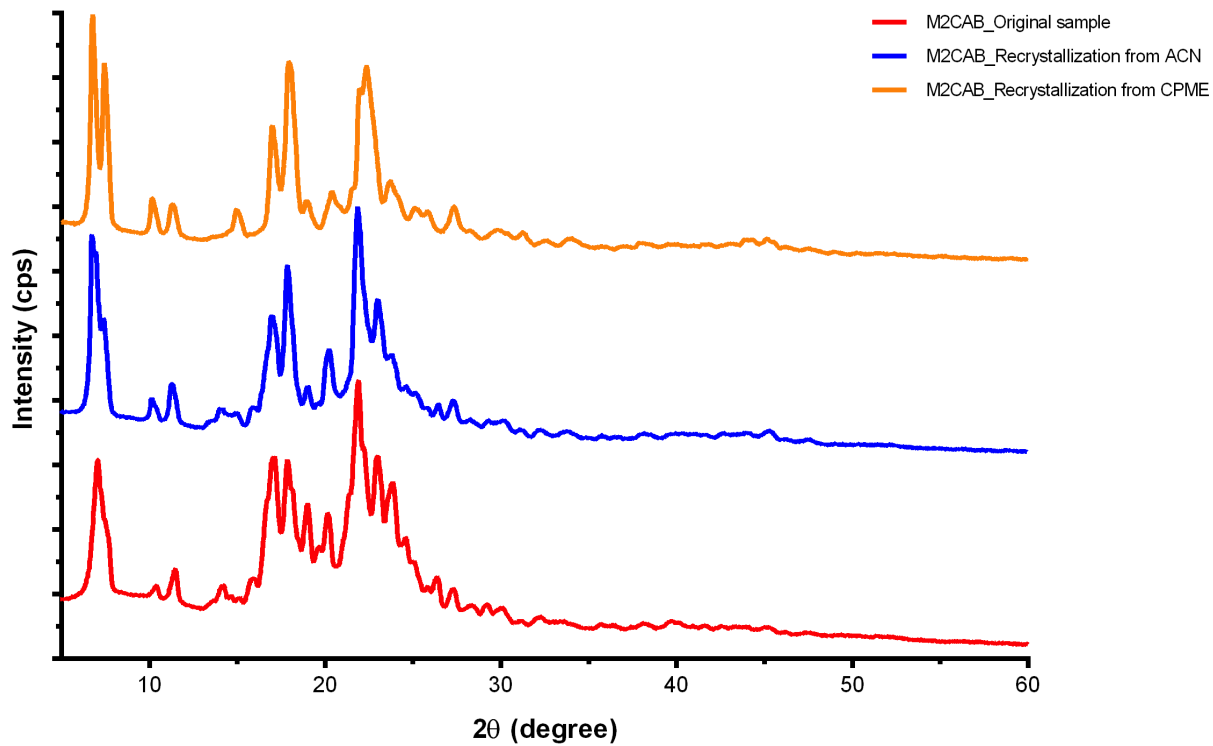

**Supplementary figure 14. X- ray diffraction (XRD) of M2CAB before and after recrystallization using ACN (acetonitrile) or CPME (cyclopentyl methyl ether). XRD analysis of M2CAB at  $2\theta = 2-70$  at  $1^\circ/\text{min}$ . Experiments were repeated independently two times with equivalent results.**

## Supplementary Tables

**Supplementary Table 1.** Comparative physicochemical characterization of CAB prodrugs.

|                                     | <b>CAB</b> | <b>MCAB</b> | <b>M2CAB</b> | <b>M3CAB</b> |
|-------------------------------------|------------|-------------|--------------|--------------|
| <b>Molecular weight (g/mol)</b>     | 405.36     | 615.31      | 671.37       | 727.44       |
| <b>Aqueous solubility (µg/mL)</b>   | 34.31      | 0.13        | 0.10         | 0.04         |
| <b>1-Octanol solubility (µg/mL)</b> | 49.10      | 5796.8      | 8057.2       | 6159.5       |
| <b>LogP<sub>ow</sub></b>            | 0.16       | 4.56        | 4.89         | 5.12         |

ow = 1-octanol/water

**Supplementary Table 2.** Characterization of M2CAB nanoformulation.

|                                         | <b>NCAB</b> | <b>NM2CAB</b> |
|-----------------------------------------|-------------|---------------|
| <b>Encapsulation efficiency (%)</b>     | 76.83       | 75.07         |
| <b>Drug Loading (%)</b>                 | 84.50       | 87.10         |
| <b>Free drug in nanoformulation (%)</b> | 0.81        | 0.41          |

**Supplementary Table 3.** Reproducibility of NM2CAB manufacture. N = 3 biologically

independent samples

| <b>Manufacture Batch no.</b> | <b>Size ± SEM (nm)</b> | <b>PDI ± SEM</b> |
|------------------------------|------------------------|------------------|
| 1                            | 320.13 ± 6.81          | 0.23 ± 0.02      |
| 2                            | 322.10 ± 2.99          | 0.21 ± 0.01      |
| 3                            | 328.67 ± 1.60          | 0.18 ± 0.03      |
| 4                            | 311.43 ± 4.53          | 0.33 ± 0.03      |
| 5                            | 287.17 ± 0.94          | 0.22 ± 0.01      |
| 6                            | 317.57 ± 2.83          | 0.27 ± 0.01      |
| 7                            | 378.00 ± 1.90          | 0.26 ± 0.01      |
| 8                            | 244.63 ± 5.85          | 0.19 ± 0.01      |
| 9                            | 268.97 ± 7.66          | 0.19 ± 0.02      |
| 10                           | 259.77 ± 2.09          | 0.23 ± 0.01      |
| 11                           | 243.00 ± 2.48          | 0.22 ± 0.01      |

**Supplementary Table 4.** Correlation between in vitro and in vivo PK assessments.

| <b>Dependent Variables</b>                                 | <b>P-Value</b> | <b>R<sup>2</sup></b> |
|------------------------------------------------------------|----------------|----------------------|
| Potency, RT activity CPM/10e6 cells EC50, nM               | 0.88           | 0.04                 |
| Potency, RT activity CPM/10e6 cells AUC, CPM/10e6 cells*nM | 0.26           | 0.84                 |
| Cell Vitality MDM, Percent*uM AUC                          | 0.77           | 0.13                 |
| log MDM uptake mmol CAB/10e6*hr AUC                        | 0.02           | 0.99                 |
| In vitro antiviral activity, Days @ 100 uM CAB eq AUC      | 0.03           | 0.99                 |

Linear regression models were used to examine the association between in vitro parameters and area-under-the-curve (AUC) of in vivo PK data of CAB and CAB prodrugs. In vivo PK AUC: N = 5 animals (NCAB), N = 3 animals (NMCAB), and N = 4 animals (NM2CAB); Potency, RT activity CPM/10e6cells EC50, nM : N = 3 biological replicates; Potency, RT activity CPM/10e6cells AUC, CPM/10e6 cells\*nM: N = 3 biological replicates; Cell Vitality MDM, Percent\*uM AUC: N = 4 biological replicates; log MDM uptake mmol CAB/10e6\*hr AUC: N = 3 biological replicates; In vitro antiviral activity, Days @ 100 uM CAB eq AUC: N = 3 biological replicates.

**Supplementary Table 5.** Characterization of M2CAB before and after recrystallization.

| <b>Recrystallization solvent</b> | <b>Recovery yield (%)</b> | <b>Melting point range after recrystallization (°C)</b> | <b>M2CAB purity</b> |
|----------------------------------|---------------------------|---------------------------------------------------------|---------------------|
| <b>Original sample</b>           | NA                        | 116-122                                                 | 98.86%              |
| <b>ACN</b>                       | <b>70%</b>                | 123-125                                                 | 99.08%              |
| <b>MeTHF</b>                     | 15%                       | 120-121                                                 | -                   |
| <b>CPME</b>                      | <b>85%</b>                | 121-122                                                 | 98.99%              |
| <b>PhMe</b>                      | 10%                       | 120-121                                                 | -                   |

## Supplementary Methods

### CAB prodrugs chemical characterization

Proton ( $^1\text{H}$ )- and carbon ( $^{13}\text{C}$ )- NMR spectra for MCAB, M2CAB, and M3CAB were recorded on a Varian Unity/Inova-500 NB (500 MHz; Varian Medical Systems Inc., Palo Alto, CA).

**MCAB:**  $^1\text{H}$  NMR (500 MHz,  $\text{CDCl}_3$ ):  $\delta$  10.13 (t,  $J = 5.7$  Hz, 1H), 8.47 (s, 1H), 7.32 (dd,  $J = 15.0$ , 8.3 Hz, 1H), 6.74-6.84 (m, 2H), 5.34 (dd,  $J = 9.9$ , 3.7 Hz, 1H) 4.59 (b, 2H), 4.33-4.46 (m, 3H), 3.94 (app t,  $J = 11.1$  Hz, 1H), 3.69 (app. t,  $J = 7.3$  Hz, 1H), 2.68 (t,  $J = 7.6$  Hz, 2H), 1.76 (p,  $J = 7.5$  Hz, 2H), 1.40 (app. d,  $J = 5.6$  Hz, 5H), 1.20-1.38 (b, 18H), 0.87 (t,  $J = 6.9$  Hz, 3H).  $^{13}\text{C}$  NMR (125 MHz,  $\text{CDCl}_3$ ):  $\delta$  171.9, 171.0, 163.3, 161.7, 161.3, 159.7, 153.5, 143.7, 130.5, 130.0, 121.2, 121.1, 119.5, 111.3, 111.1, 104.0, 103.8, 103.6, 82.3, 73.1, 54.9, 52.0, 36.5, 33.7, 31.9, 29.7, 29.5, 29.3, 29.0, 24.5, 22.7, 17.0, 14.1. HRMS (ESI-TOF)  $m/z$ :  $[\text{M} + \text{H}]^+$ : calculated for  $\text{C}_{33}\text{H}_{44}\text{F}_2\text{N}_3\text{O}_6^+$ , 615.31 (100.0%), 616.32 (37.7%), 617.32 (3.5%); found, 616.28.

**M2CAB:**  $^1\text{H}$  NMR (500 MHz,  $\text{CDCl}_3$ ):  $\delta$  10.13 (t,  $J = 5.7$  Hz, 1H), 8.47 (s, 1H), 7.33 (dd,  $J = 14.9$ , 8.4 Hz, 1H), 5.34 (dd,  $J = 9.9$ , 3.8 Hz, 1H), 4.60 (b, 2H), 4.33-4.47 (m, 3H), 3.94 (t,  $J = 11.1$  Hz, 1H), 3.70 (app. t,  $J = 7.4$  Hz, 1H), 2.68 (t,  $J = 7.6$  Hz, 2H), 1.77 (p,  $J = 7.6$  Hz, 2H), 1.41 (app. d,  $J = 5.8$  Hz, 4H), 1.20-1.38 (b, 27H), 0.87 (t,  $J = 6.9$  Hz, 3H).  $^{13}\text{C}$  NMR (125 MHz,  $\text{CDCl}_3$ ):  $\delta$  171.9, 171.1, 163.3, 163.2, 161.7, 161.3, 159.7, 153.5, 143.7, 130.6, 130.5, 130.0, 121.3, 121.1, 119.5, 111.3, 111.1, 104.0, 103.8, 103.6, 82.3, 73.1, 54.9, 52.0, 36.6, 33.7, 31.9, 29.7, 29.6, 29.5, 29.4, 29.3, 29.1, 24.5, 22.7, 17.1, 14.1. HRMS (ESI-TOF)  $m/z$ :  $[\text{M} + \text{H}]^+$ : calculated for  $\text{C}_{37}\text{H}_{52}\text{F}_2\text{N}_3\text{O}_6^+$ , 671.37 (100%), 672.38 (40.0%), 673.38 (7.8%); found, 672.34.

**M3CAB:**  $^1\text{H}$  NMR (500 MHz,  $\text{CDCl}_3$ ):  $\delta$  10.13 (t,  $J = 5.8$  Hz, 1H), 8.46 (s, 1H), 7.33 (dd,  $J = 14.9$ , 8.4 Hz, 1H), 6.72-6.87 (m, 2H), 5.35 (dd,  $J = 9.9$ , 3.8 Hz, 1H), 4.60 (b, 2H), 4.34-4.48 (m, 3H), 3.95 (t,  $J = 11.1$  Hz, 1H), 3.71 (app. t,  $J = 7.4$  Hz, 1H), 2.68 (t,  $J = 7.6$  Hz, 2H), 1.98 (p,  $J = 7.5$

Hz, 2H), 1.41 (app. d,  $J = 5.8$  Hz, 5H), 1.20-1.38 (b, 34H), 0.87 (t,  $J = 6.9$  Hz, 3H).  $^{13}\text{C}$  NMR (125 MHz,  $\text{CDCl}_3$ ):  $\delta$  171.9, 171.1, 163.4, 163.3, 163.2, 161.7, 161.3, 159.7, 153.5, 143.7, 130.6, 130.5, 129.9, 121.2, 121.1, 119.5, 111.3, 111.1, 104.0, 103.8, 103.6, 82.3, 73.1, 54.9, 52.0, 36.6, 33.7, 31.9, 29.7, 29.6, 29.5, 29.4, 29.3, 29.1, 24.5, 22.7, 17.1, 14.1. HRMS (ESI-TOF)  $m/z$ :  $[\text{M} + \text{H}]^+$ : calculated for  $\text{C}_{41}\text{H}_{60}\text{F}_2\text{N}_3\text{O}_6$ , 727.44 (100%), 728.44 (44.3%), 729.44 (6.9%); found, 728.47.

### **Quantitation of CAB, MCAB, M2CAB and M3CAB by UPLC-MS/MS**

CAB, MCAB, M2CAB, and M3CAB were quantitated in mouse and rhesus macaque plasma, blood and tissues by UPLC-MS/MS using a Waters ACQUITY H-class UPLC (Waters, Milford, MA, USA) connected to a Xevo TQ-S micro mass spectrometer. All solvents for sample processing and UPLC-MS/MS analysis were LC-MS-grade (Fisher). For plasma and blood samples, 25  $\mu\text{L}$  of sample was added into 1 mL ACN spiked with 10  $\mu\text{L}$  internal standard (IS). d3-Dolutegravir (d3-DTG), myristoylated dolutegravir (MDTG), and stearylated darunavir (SDRV), at a final concentration of 40, 20 and 20 ng/mL, respectively, were used as ISs for CAB, MCAB, and M2CAB/M3CAB analyses, respectively. Samples were vortexed and centrifuged at  $17,000 \times g$  for 10 minutes at  $4^\circ\text{C}$ . The supernatants were collected and dried using a SpeedVac and reconstituted in 100  $\mu\text{L}$  80% methanol; 10  $\mu\text{L}$  was injected for MCAB, M2CAB, and M3CAB UPLC-MS/MS analyses. For CAB analysis, 20  $\mu\text{L}$  of above reconstitute in 80% methanol was mixed with 80  $\mu\text{L}$  of 50% ACN before LC-MS/MS injections. Standard curves were prepared in blank mouse or rhesus macaque plasma/blood in the range of 0.2-500 ng/mL for CAB, MCAB, M2CAB, and M3CAB. For tissue drug quantitation, 3-200 mg of sample was homogenized in 4-29 volumes of 0.1% v/v formic acid and 2.5 mM ammonium formate containing 90% methanol. To 100  $\mu\text{L}$  of tissue homogenate was added 280  $\mu\text{L}$  methanol containing 0.1% formic acid and 2.5 mM ammonium formate, 80% methanol (10  $\mu\text{L}$ ), and IS (10  $\mu\text{L}$ ), followed by vortexing for 3 minutes and centrifugation at  $17,000 \times g$  for 15 minutes. For

MCAB, M2CAB, and M3CAB analyses, 85  $\mu$ l of supernatant was mixed with 15  $\mu$ l water. For CAB analysis, 20  $\mu$ l of supernatant was mixed with 80  $\mu$ l of 50% ACN. These aliquots were vortexed, centrifuged at 17,000 x g for 10 minutes, and 10  $\mu$ l of supernatant was used for UPLC-MS/MS analysis. Standards were prepared similarly using blank tissue homogenates with 10  $\mu$ l of spiking solution (CAB/MCAB/M2CAB/M3CAB, 5-5,000 ng/mL in 80% MeOH containing 0.1% formic acid and 2.5 mM ammonium formate). For CAB quantitation, chromatographic separation of 10  $\mu$ l CAB sample was performed on a Waters ACQUITY UPLC BEH Shield RP18 column (1.7  $\mu$ m, 2.1 mm x 100 mm) using a 7-minute gradient of mobile phase A (7.5 mM ammonium formate in water, adjusted to pH 3 using formic acid) and mobile phase B (100% ACN) at a flow rate of 0.25 mL/minute. For the first 3.5 minutes, the mobile phase composition was 35% B and was increased to 95% B in 0.5 minute and held constant for 1.5 minutes. Mobile phase B was then reset to 35% in 0.5 minute, and the column was equilibrated for 1 minute before the next injection. For MCAB and M2CAB quantitation chromatographic separation was achieved on a Waters ACQUITY UPLC BEH Shield RP18 column (1.7  $\mu$ m, 2.1 mm x 30 mm) using an 8-minute gradient method at a flow rate of 0.28 mL/minute. For MCAB, the initial mobile phase composition was 80% B for the first 2 minutes, and increased to 95% B in 4 minutes, held constant for 0.75 minute, reset to 80% in 0.25 minute, and the column was equilibrated for 1 minute before the next injection. For M2CAB, the initial mobile phase composition was 85% B for the first 5 minutes, and increased to 95% B in 0.25 minute, held constant for 1 minute, reset to 85% in 0.25 minute and the column was equilibrated for 1 minute before the next injection. For M3CAB quantitation chromatographic separation was achieved with the same column using an 8-minute gradient method at a flow rate of 0.35 mL/minute. The initial mobile phase composition was 88% B for the first 5 minutes, and increased to 95% B in 0.25 minute, held constant for 1.5 minutes, reset to 88% B in 0.25 minute, and the column was equilibrated for 1 minute before the next injection. CAB, MCAB, M2CAB, and M3CAB were detected at a cone voltage of 10 V, 24 V, 2 V, and 20 V, respectively, and a collision energy of

24 V, 18 V, 24 V, and 26 V, respectively, in the positive ionization mode. Multiple reaction monitoring (MRM) transitions used for CAB, MCAB, M2CAB, M3CAB, d3-DTG, MDTG, and SDRV were 406.04 > 126.93, 616.28 > 406.09, 672.34 > 406.07, 728.47 > 406.09, 422.84 > 129.99, 630.20 > 420.07, and 814.52 > 658.44, respectively. Spectra were analyzed and quantified by MassLynx software version 4.1. All quantitation's were determined using analyte peak area to internal standard peak area ratios.
